# Supplementary material
Source: publisher figshare collection journal article supplement (https://acs.figshare.com/ndownloader/files/4193593)
Supplement: Supplementary file 1 [file 4193593]

## Characteristics of Pickering Emulsion Gels Formed by Droplet Bridging

Matthew N. Lee, Hubert K. Chan, and Ali Mohraz  
Department of Chemical Engineering & Materials Science  
University of California, Irvine  
Irvine, CA 92697  
Email: [mohraz@uci.edu](mailto:mohraz@uci.edu)

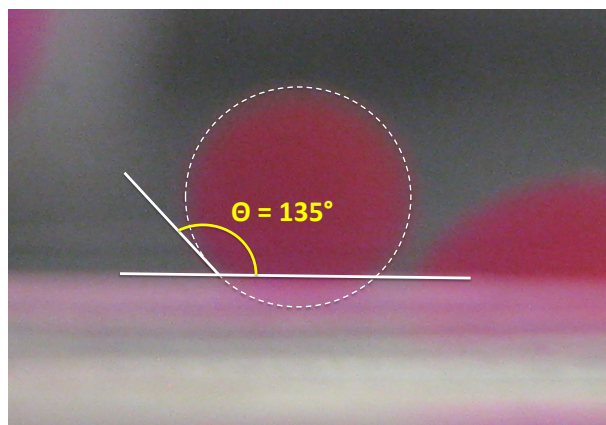

**Figure S1.** Measurement of the equilibrium three-phase contact angle by the buoyant droplet method. The bottom surface is a microscope slide that is spin-coated with the modified silica particles.

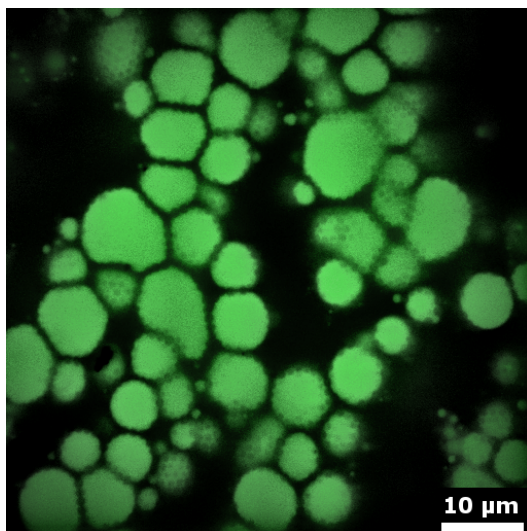

**Figure S2.** Confocal microscopy image of a Pickering emulsion gel prepared with  $\eta = 20/80$  and  $\phi_p = 0.08$ . The aqueous phase has been labeled with fluorescent rhodamine B dye to illustrate the water-in-oil droplet arrangement.

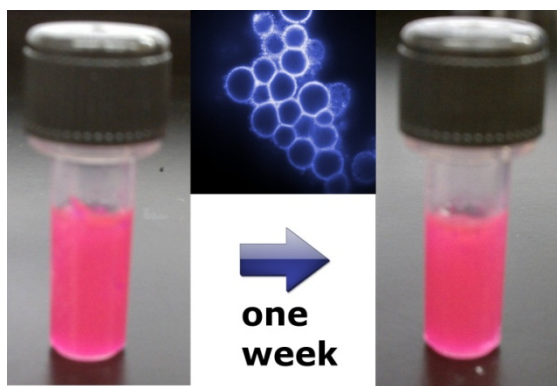

**Figure S3.** Digital and confocal images of a Pickering emulsion gel, demonstrating the macroscopic homogeneity of the sample, and its mechanical stability over a 7-day period.

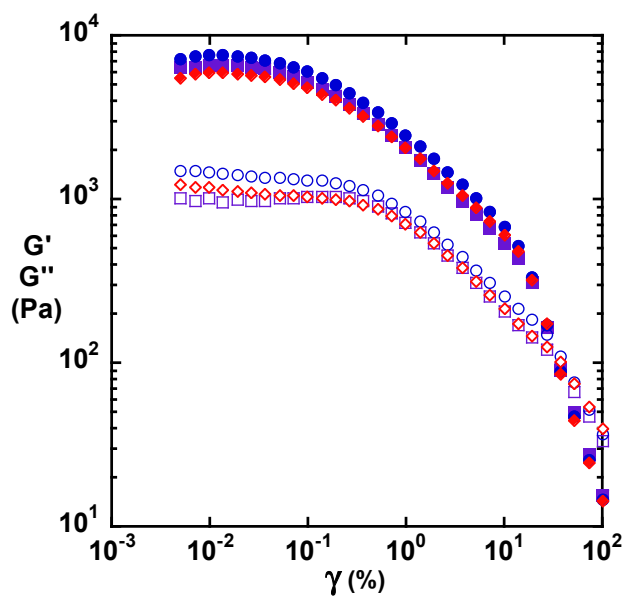

**Figure S4.** Strain sweeps on a number of Pickering emulsion gels prepared at  $\eta = 50/50$ ,  $\phi_p = 0.08$ , demonstrating the reproducibility of the rheological measurements.

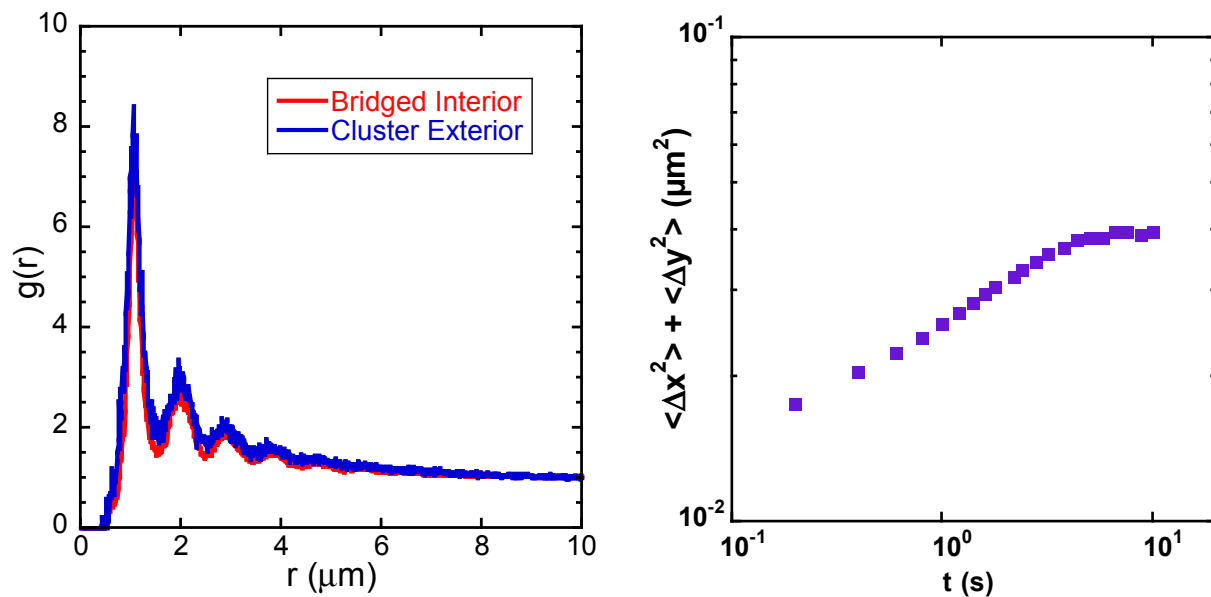

**Figure S5.** a) Radial distribution function of particles in the cluster interior and exterior. The first peak in both populations corresponds to  $r = 1.05 \mu\text{m}$  or  $r/D = 1.08$ . b) Mean squared displacements of particles in the cluster interior. The sub-diffusive behavior at short delay times leads to a plateau at long  $t$ , indicative of caged dynamics in the concentrated particle monolayer.

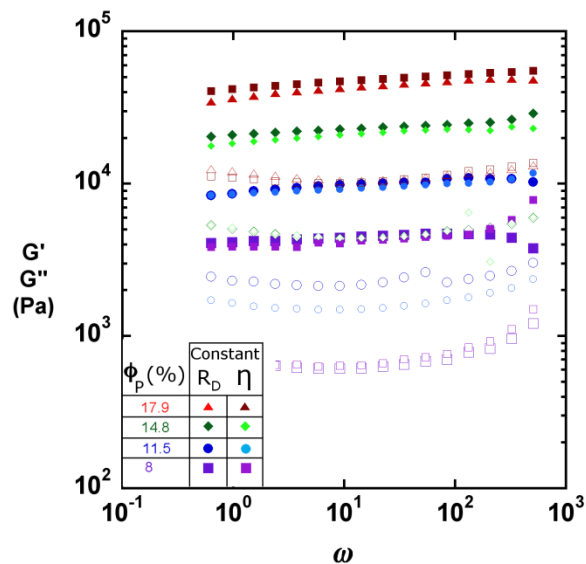

**Figure S5.** Frequency sweep profiles for the Pickering emulsion gels shown in Figure 4b and 4c in the main text.

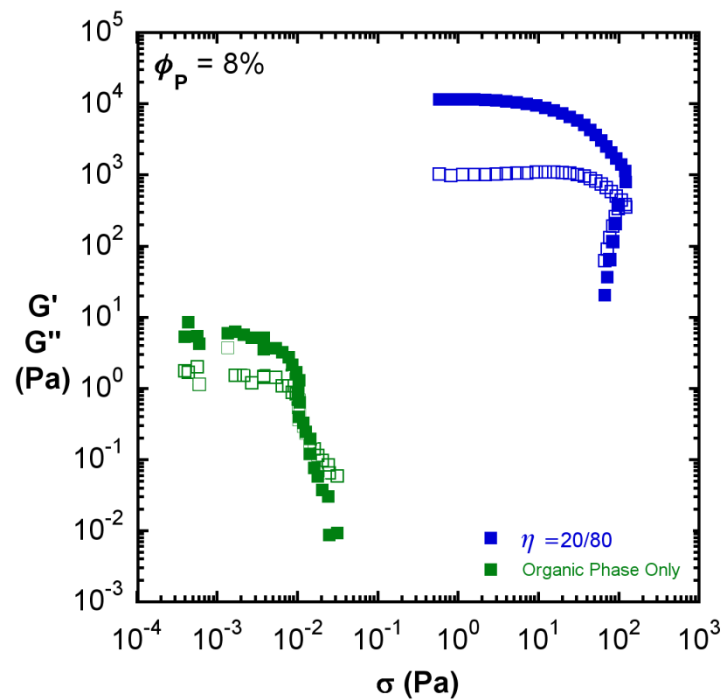

**Figure S6.** Stress sweep profiles for a Pickering emulsion gel prepared with  $\eta = 20/80$  and  $\phi_P = 0.08$  and for a sample prepared with the same number of particles in the organic phase alone ( $\eta = 0/100$ ).
